# Supplementary material for: NorSand4AI: A Comprehensive Triaxial Test Simulation Database for NorSand Constitutive Model Materials
Source: Copernicus journal article supplement (doi:10.5194/egusphere-2023-1690), 2023-09-18
Supplement: Supplementary file [file egusphere-2023-1690-AC1-supplement.zip]

Ridge

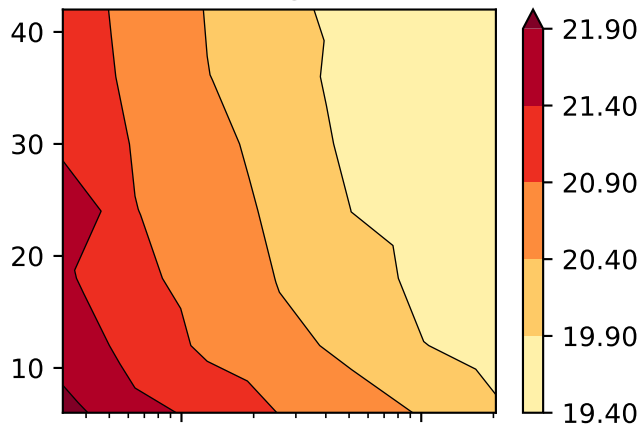

KNeighborsRegressor

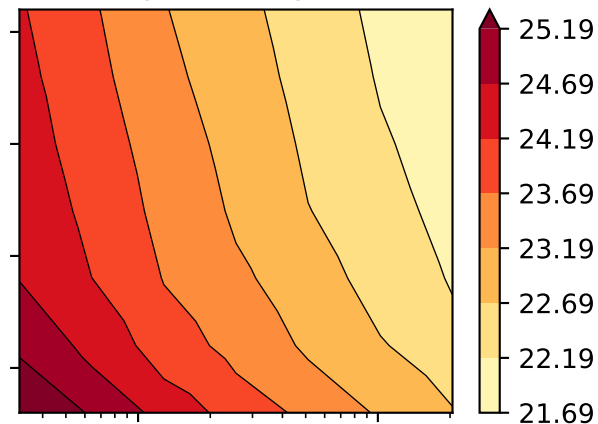

Ridge-K

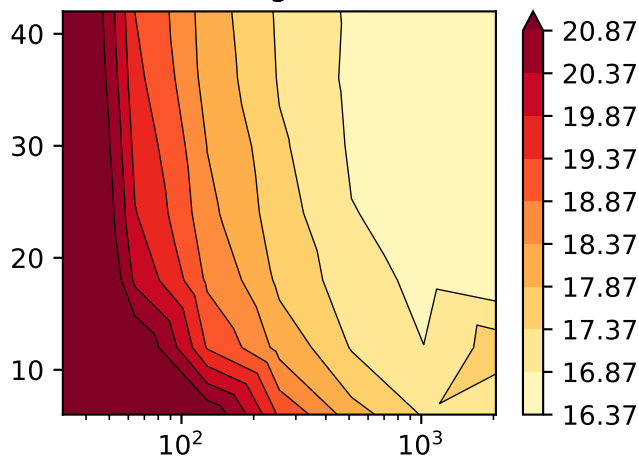

Ridge-KT

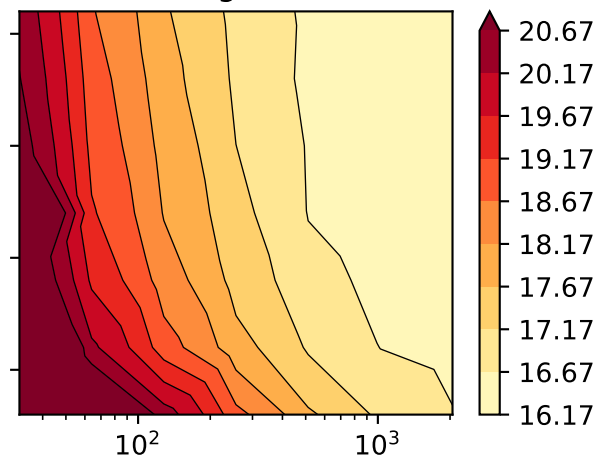

Number of constitutive parameters samples
